# Supplementary material
Source: PubMed Central journal article supplement (PMC165820)

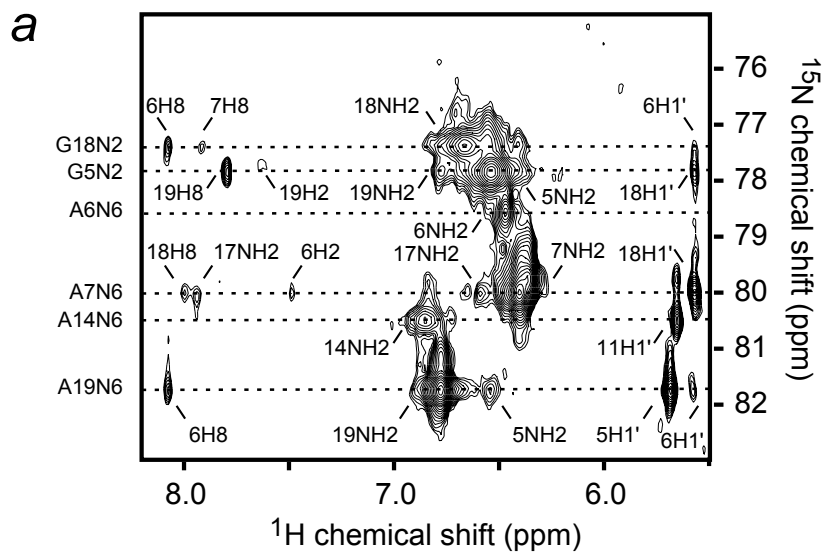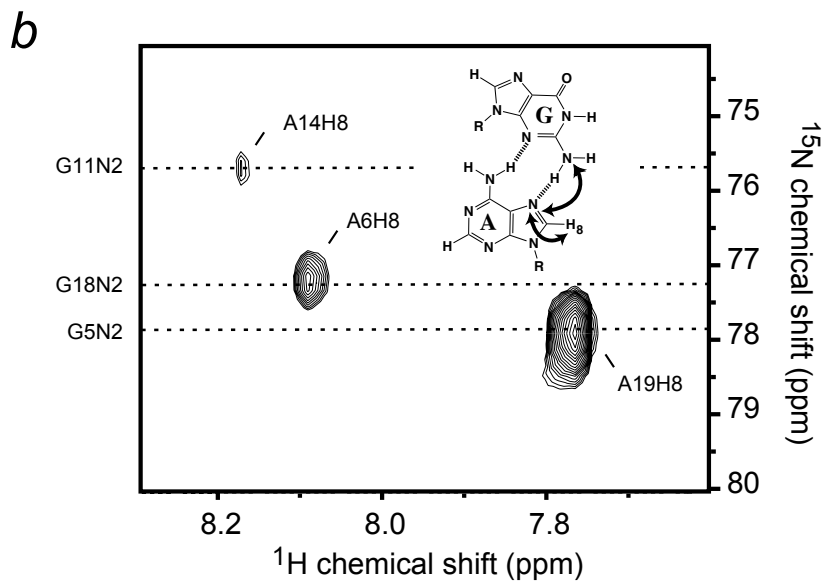

Supplement: pnas_0832440100_2.pdf [file pnas_0832440100_2.pdf]

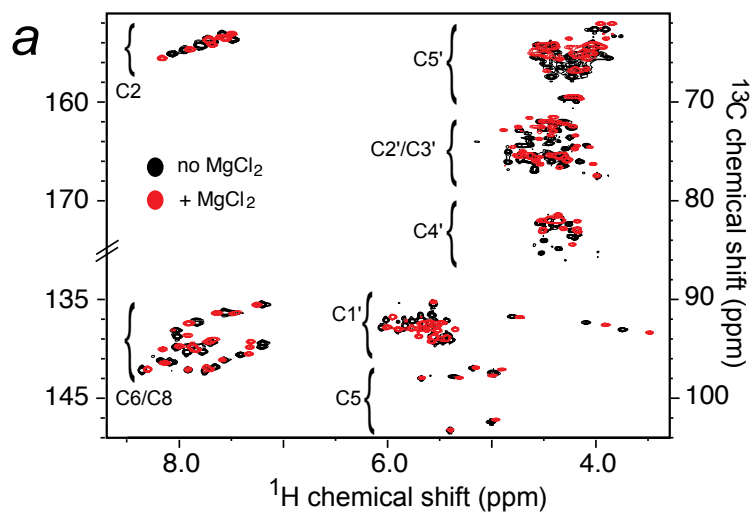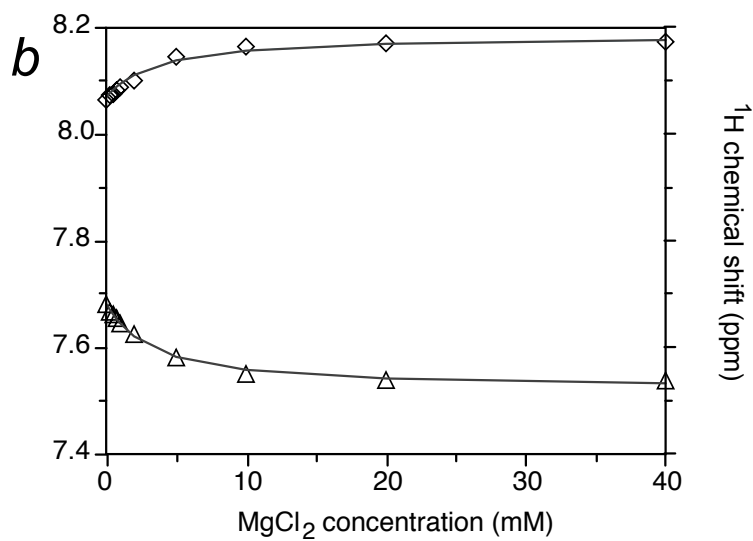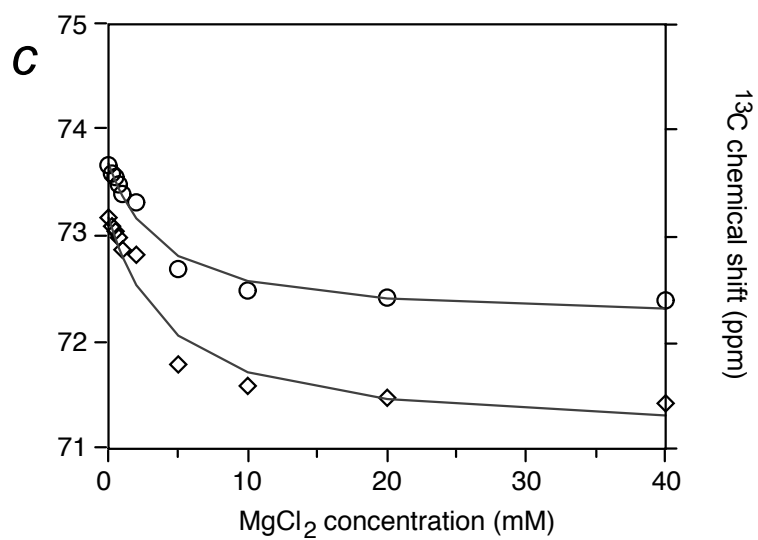

Supplement: pnas_0832440100_4.pdf [file pnas_0832440100_4.pdf]

*a*

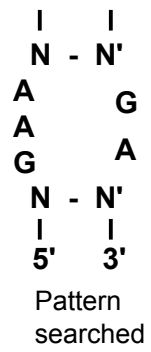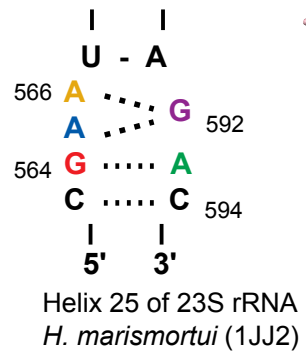

*b*

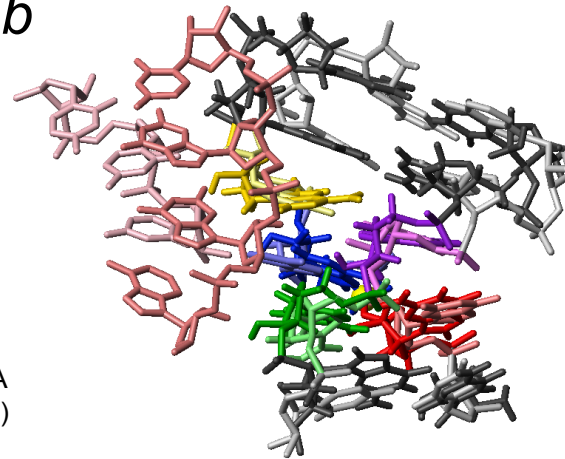

*c*

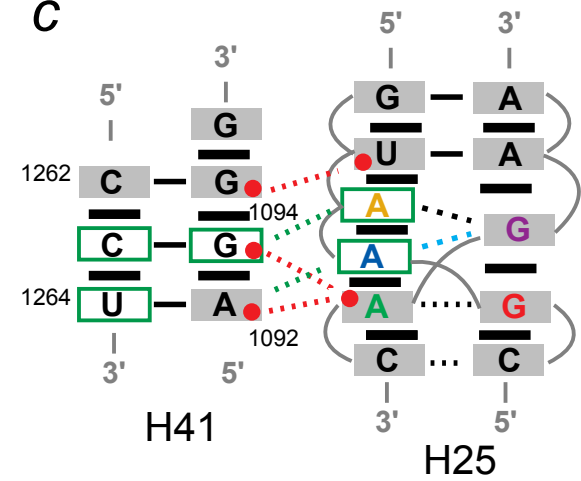

Supplement: pnas_0832440100_6.pdf [file pnas_0832440100_6.pdf]
